# Supplementary material for: Reactions of thiacalix[4]arene 1,3-bistriflate: formation of thiacalix[2]phenoxathiins—structural and complexation studies
Source: Royal Society of Chemistry journal article supplement (doi:10.1039/b801483c), 2008-01-01
Supplement: b801483c.pdf [file b801483c.pdf]

## Supplementary Information

### Reactions of thiacalix[4]arene 1,3-bistriflate: formation of thiacalix[2]phenoxathiins –structural and complexation studies

Almeqdad Habashneh<sup>1</sup>, Julie Collins,<sup>2</sup> Cester R. Jablonski<sup>1</sup>  
and Paris E. Georghiou<sup>1\*</sup>

1. Department of Chemistry, Memorial University of Newfoundland, St. John's, Newfoundland, NL, Canada A1B 3X7.

2. CREAT, Memorial University of Newfoundland, St. John's, Newfoundland, NL, Canada A1B 3X7

#### Table of Contents

| Page | Description                                                  |
|------|--------------------------------------------------------------|
| S2   | <sup>1</sup> H- and <sup>13</sup> C NMR spectra of <b>2</b>  |
| S3   | <sup>1</sup> H- and <sup>13</sup> C NMR spectra of <b>2f</b> |
| S4   | <sup>1</sup> H- and <sup>13</sup> C NMR spectra of <b>2g</b> |
| S5   | <sup>1</sup> H- NMR spectra of <b>2i</b>                     |
| S6   | <sup>13</sup> C NMR spectra of <b>2i</b>                     |
| S7   | <sup>1</sup> H- and <sup>13</sup> C NMR spectra of <b>3</b>  |
| S8   | <sup>1</sup> H- and <sup>13</sup> C NMR spectra of <b>3a</b> |
| S9   | Binding Isotherms for <b>3</b> and Ag <sup>+</sup>           |
| S10  | Binding Isotherms for <b>3</b> and Hg <sup>2+</sup>          |

\* Corresponding author. e-mail: parisg@mun.ca

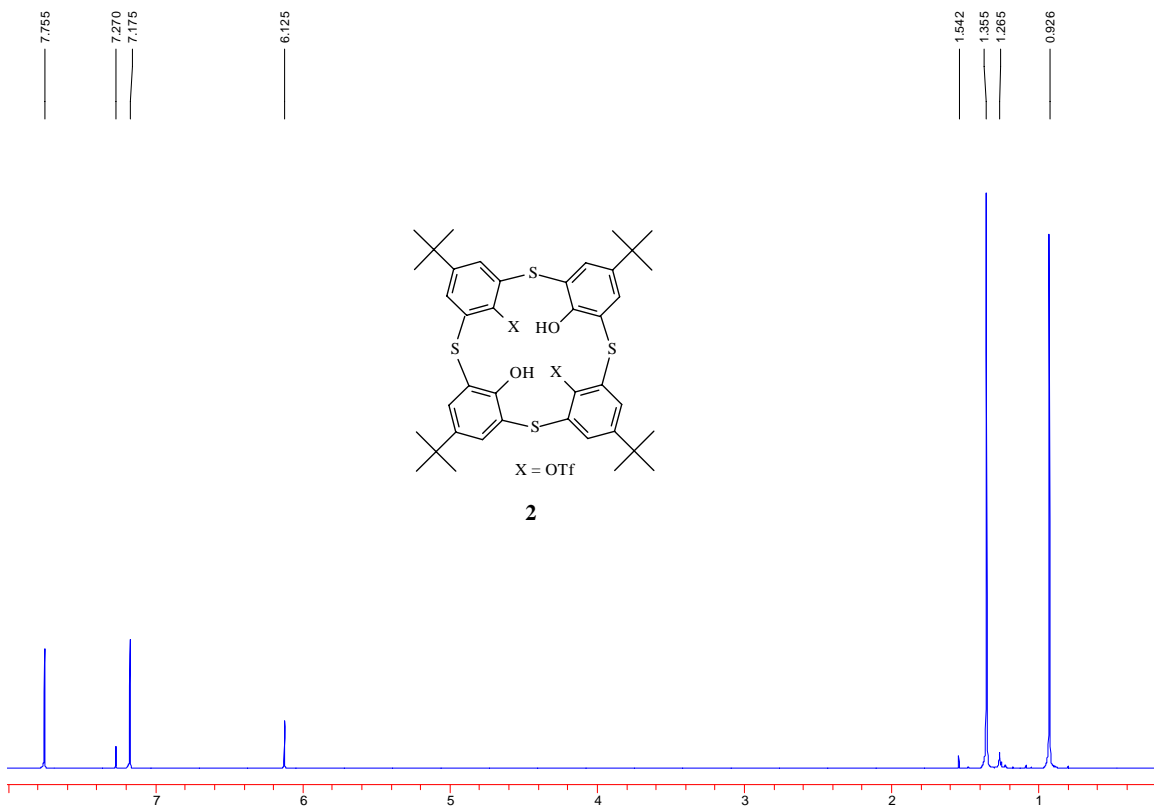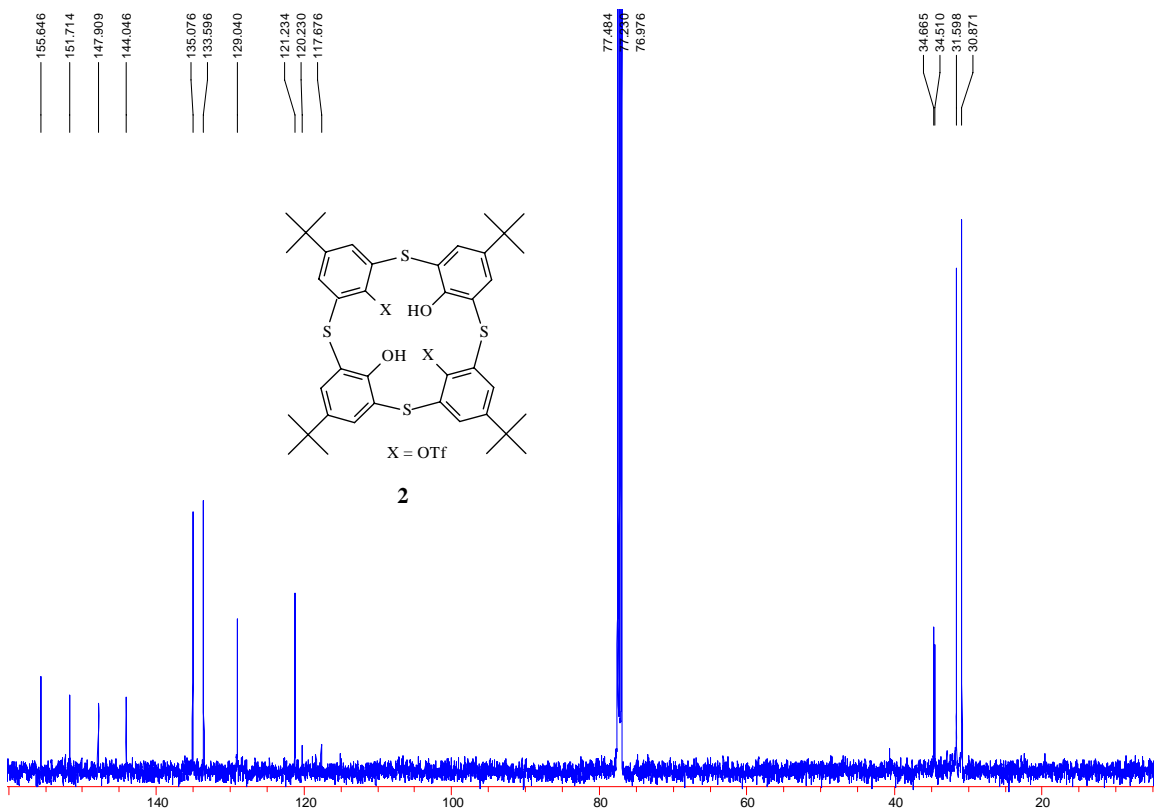

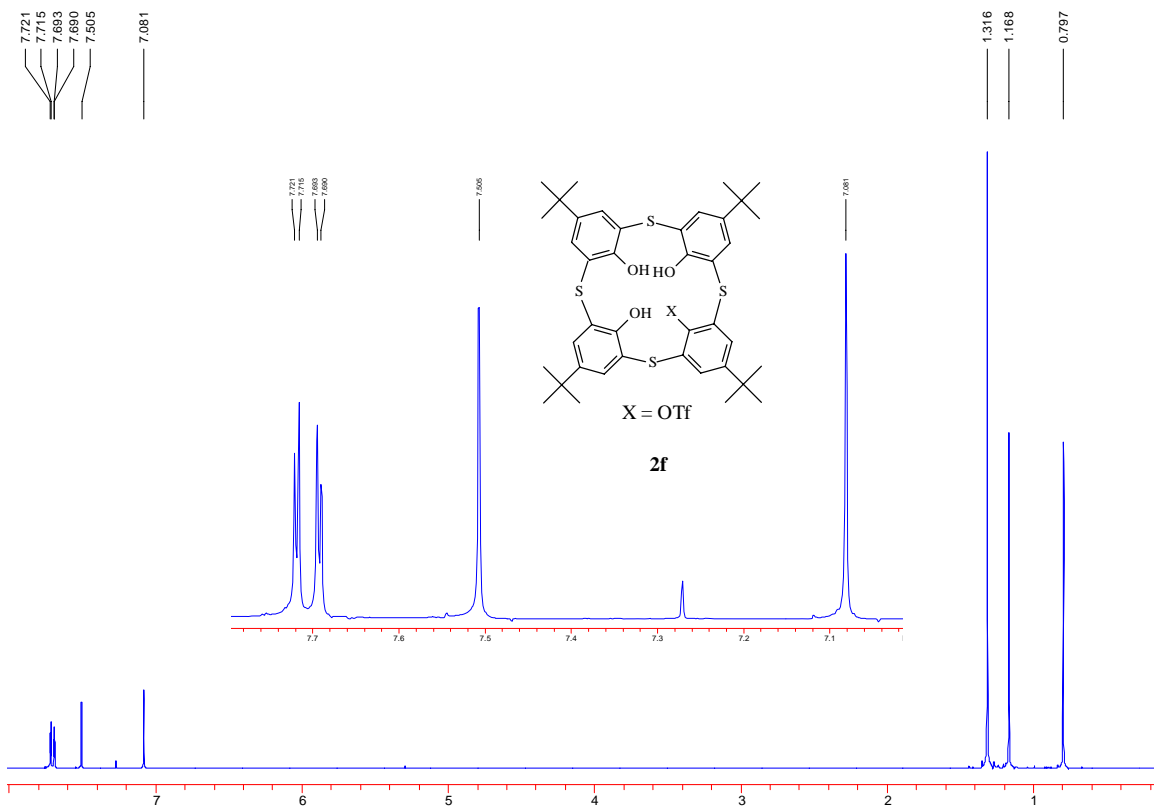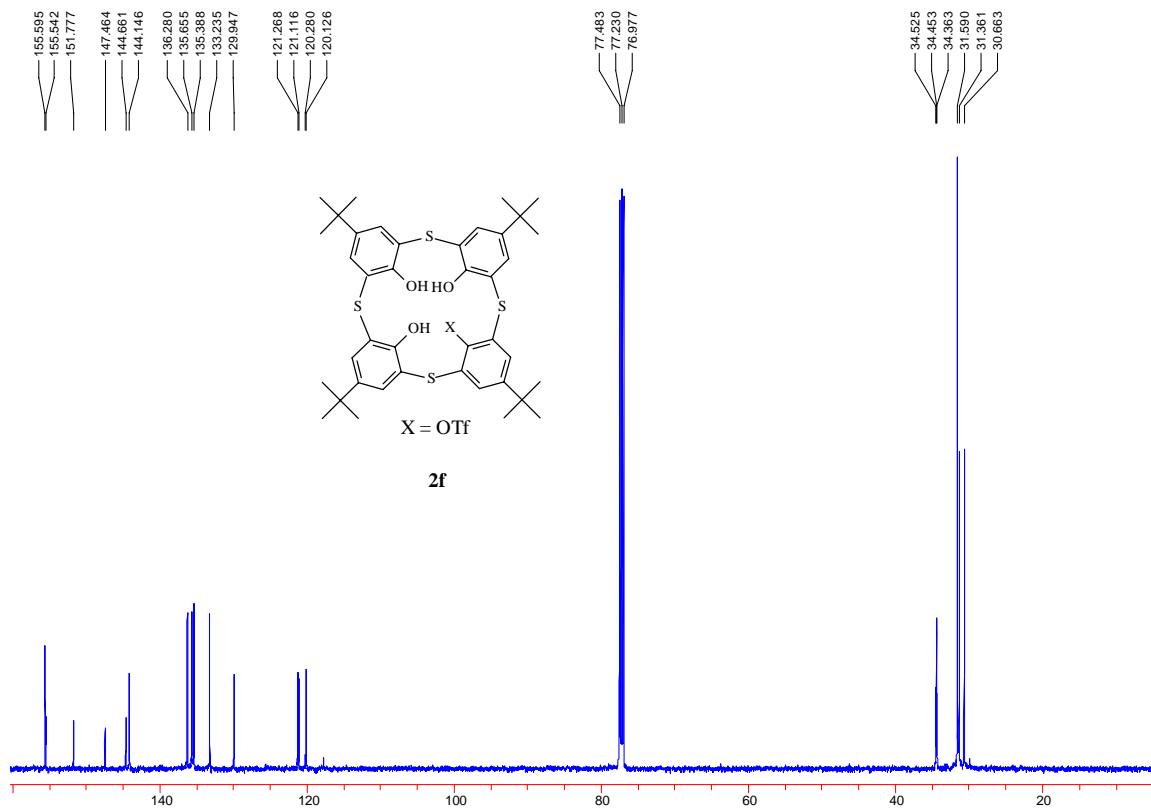



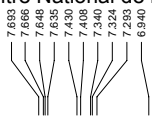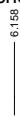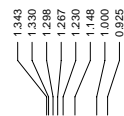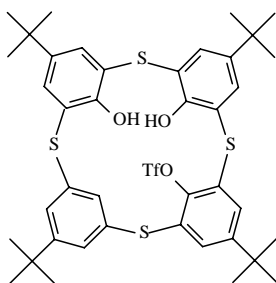

2i

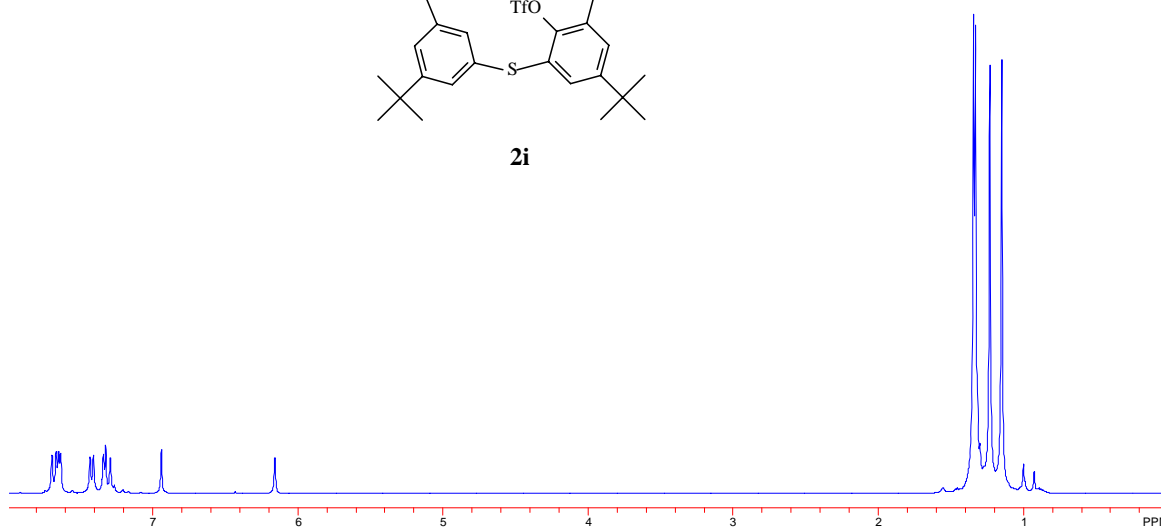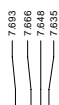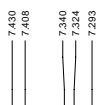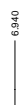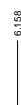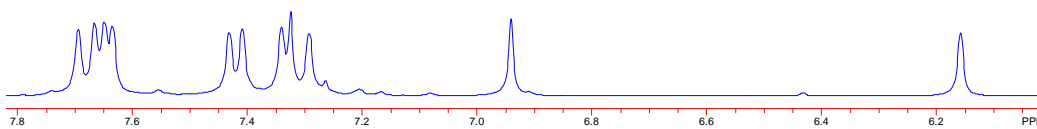

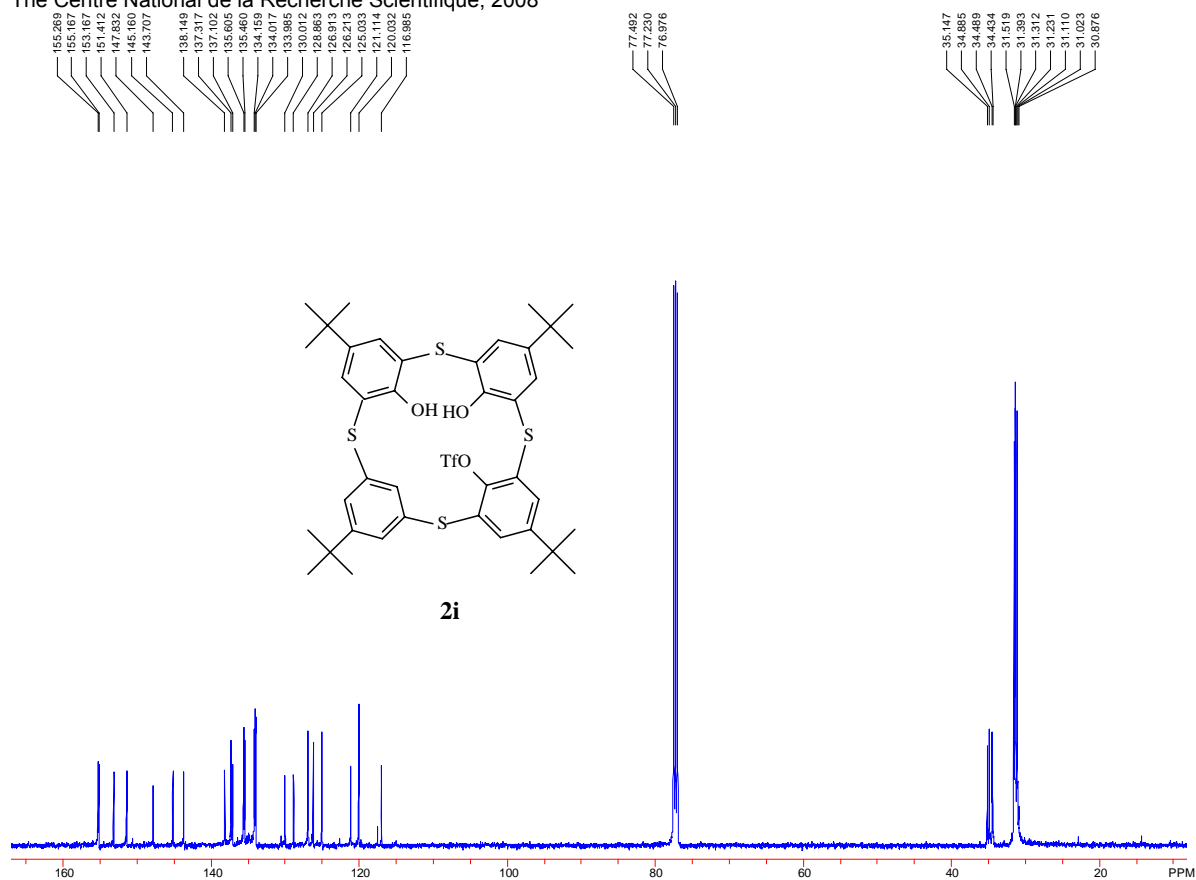

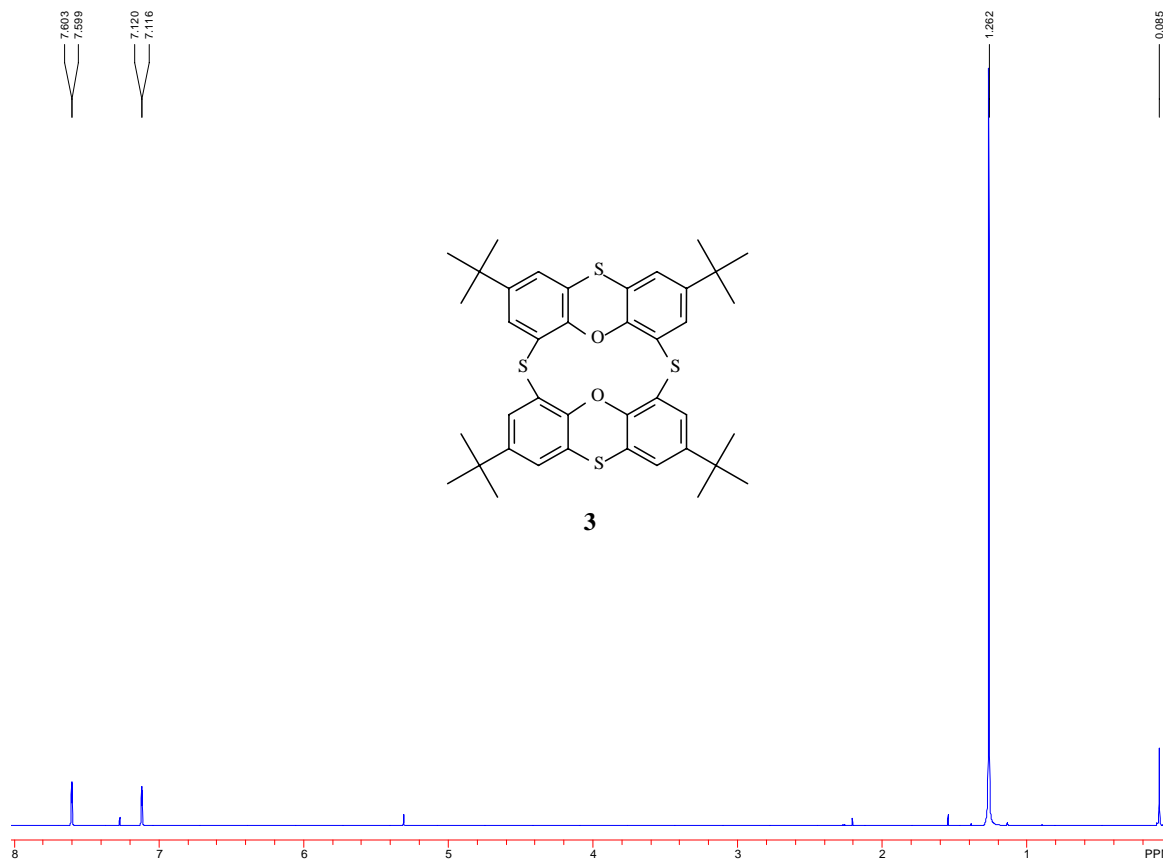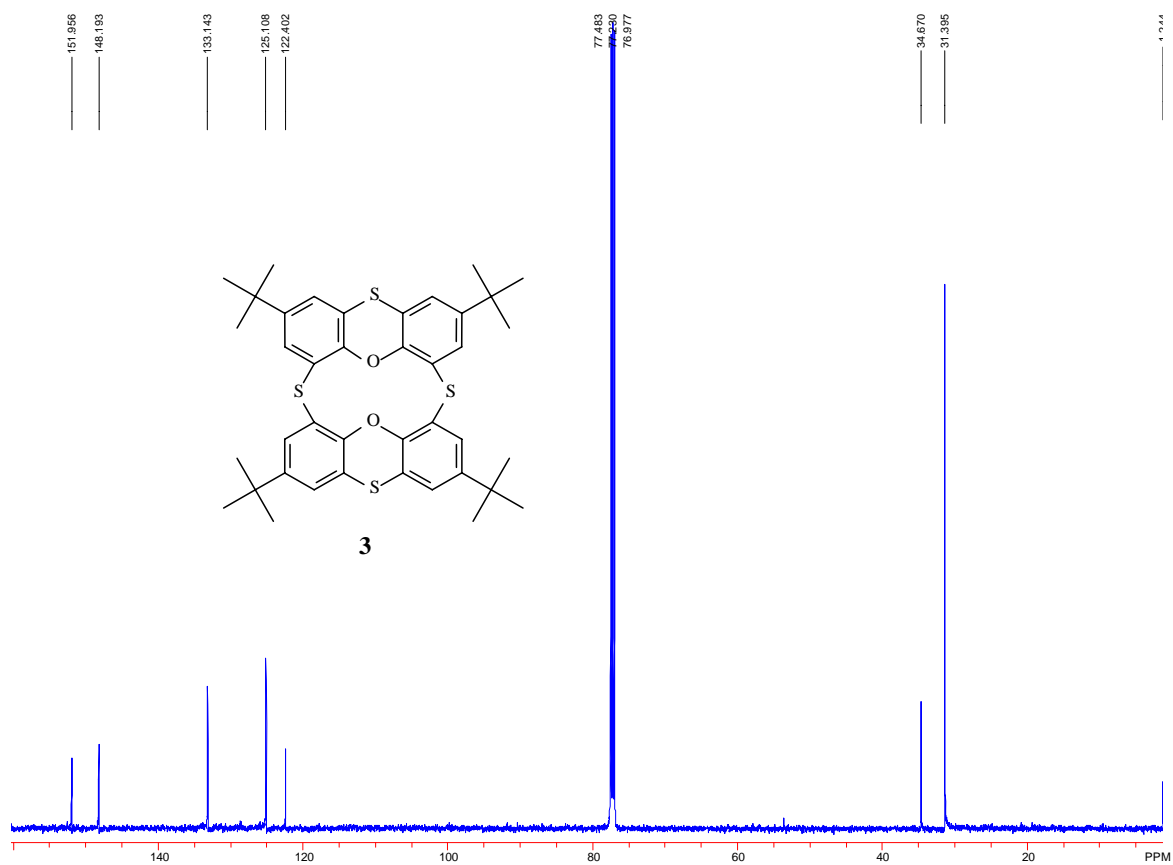

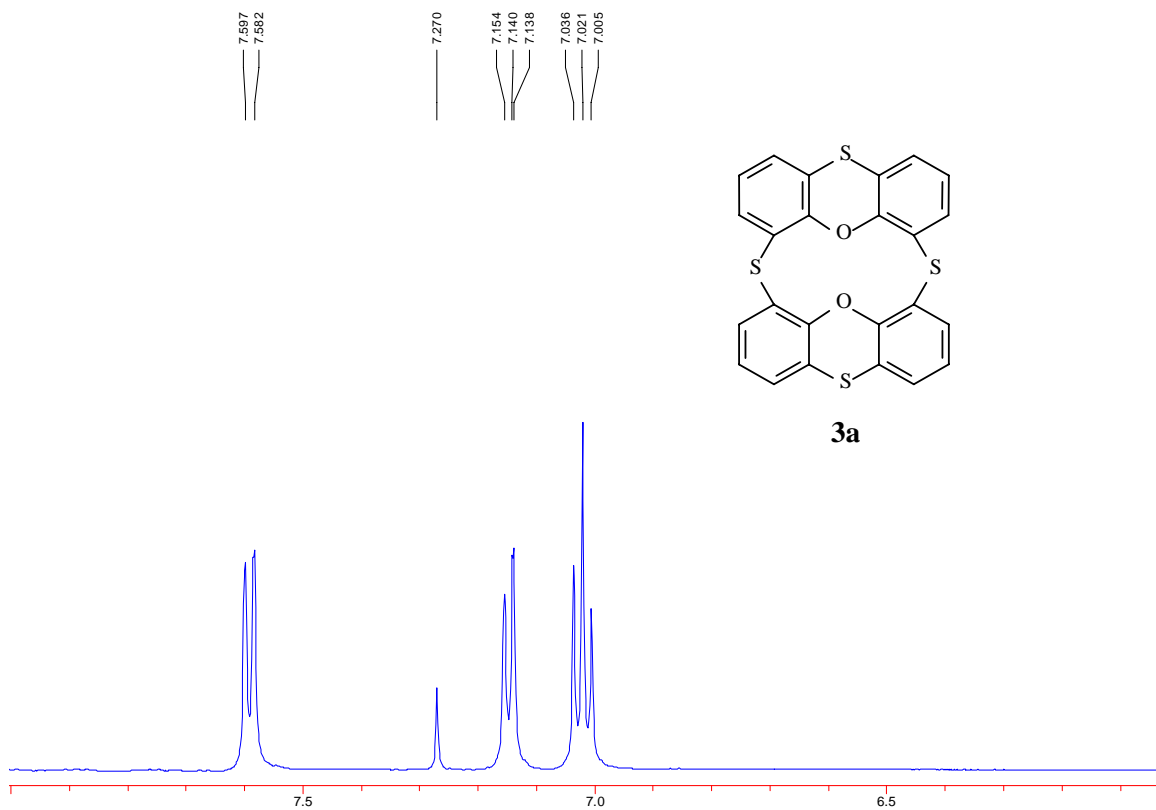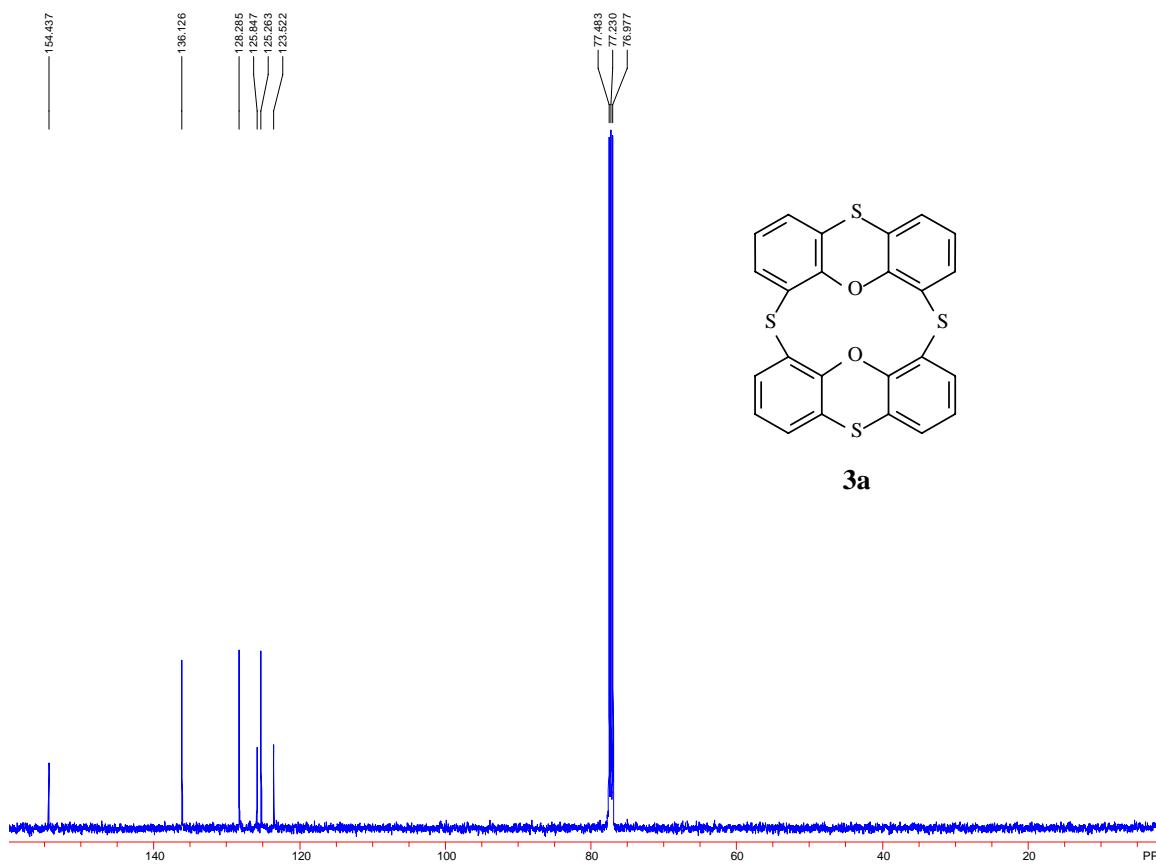



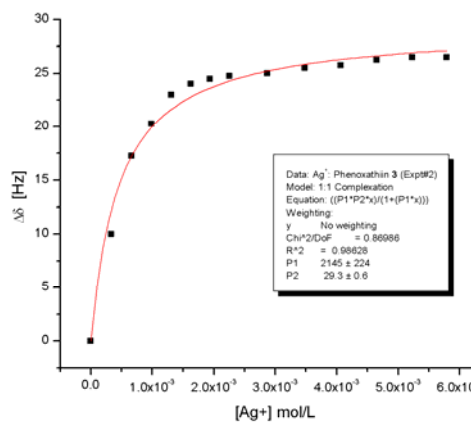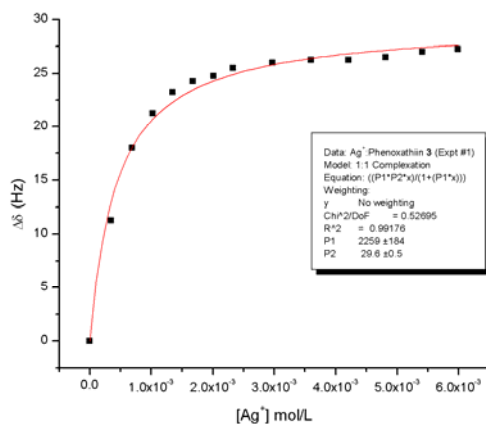

Binding isotherms from repeat experiments of titrations of aliquots of [AgO<sub>2</sub>CCF<sub>3</sub>] added to solutions of *tert*-butylbisphenoxathiin **3** in 1:9 CDCN:CDCl<sub>3</sub> (v/v).

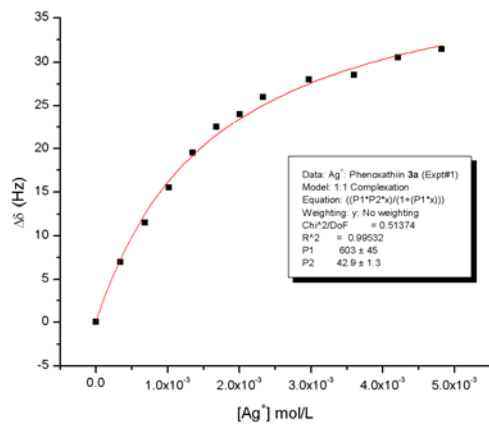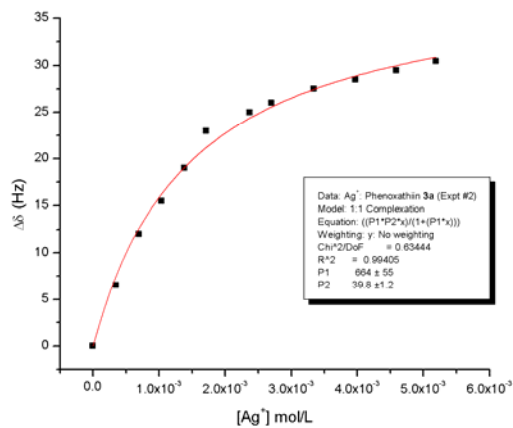

Binding isotherms from repeat experiments of titrations of aliquots of [AgO<sub>2</sub>CCF<sub>3</sub>] added to solutions of bisphenoxathiin **3a** in 1:9 CDCN:CDCl<sub>3</sub> (v/v).

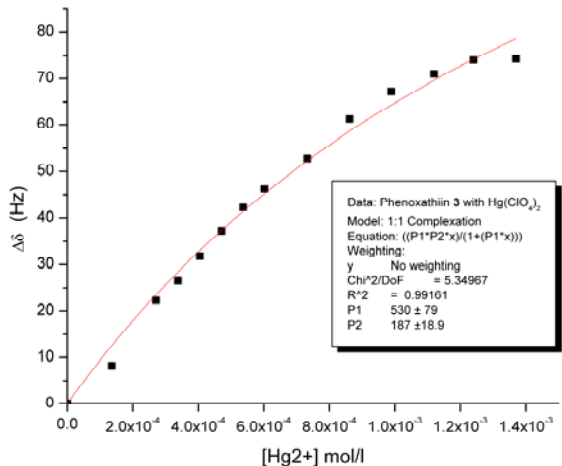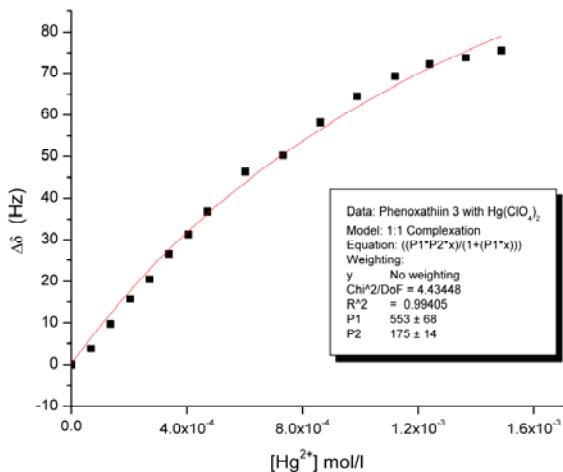

Binding isotherms from repeat experiments of titrations of aliquots of  $[\text{Hg}(\text{ClO}_4)_2]$  added to solutions of bisphenoxathiin **3** in 1.5:9  $\text{D}_3\text{COD}:\text{CDCl}_3$  (v/v).

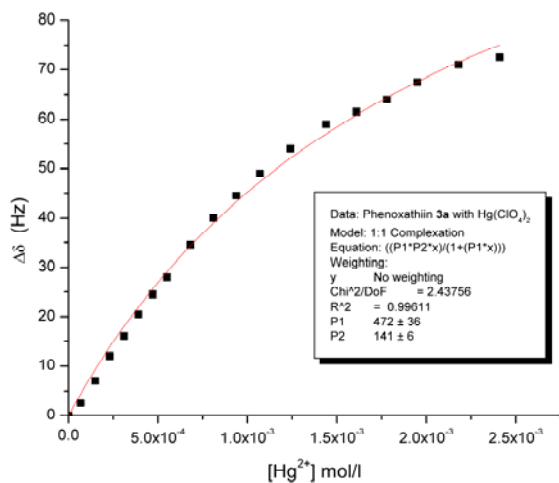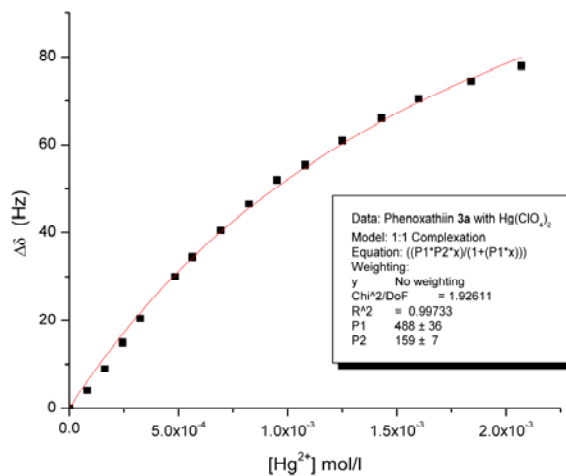

Binding isotherms from repeat experiments of titrations of aliquots of  $[\text{Hg}(\text{ClO}_4)_2]$  added to solutions of bisphenoxathiin **3a** in 1.5:9  $\text{D}_3\text{COD}:\text{CDCl}_3$  (v/v).
